# Supplementary material for: Sol-gel processing of alkoxysilyl-substituted nickel complexes for the preparation of highly dispersed nickel in silicaElectronic supplementary information (ESI) available: Tables S1–S5 giving additional analytical data as described in the text and the exact quantities for the syntheses. See http://www.rsc.org/suppdata/nj/b1/b110612k/
Source: Royal Society of Chemistry journal article supplement (doi:10.1039/b110612k), 2002-05-27
Supplement: b110612k.doc [file b110612k.doc]

**Supplementary Information**

Gregor Trimmel, Christian Lembacher, Guido Kickelbick and Ulrich Schubert

*Institute of Materials Chemistry, Vienna University of Technology, Getreidemarkt 9/165, A-1060 Wien, Austria*

**Sol-Gel Processing of Alkoxysilyl-Substituted Nickel Complexes for the Preparation of Highly Dispersed Nickel in Silica**

Table S1. Surface and pore analyses.

| Sample | specific surface area (BET) [m2/g] | | | total pore volume  at p/p0 >0.99 [cm³/g] | | | specific pore volumea (BJH) [cm³/g] | | | av. pore radiusa (BJH) [nm] | | | type of isotherm (IUPAC) | | |
| --- | --- | --- | --- | --- | --- | --- | --- | --- | --- | --- | --- | --- | --- | --- | --- |
|  | x | o | r | x | o | r | x | o | r | x | o | r | x | o | r |
| NO(A) | 138 | 384 | 402 | 0.392 | 0.618 | 0.603 | 0.397 | 0.612 | 0.575 | 4.9 | 3.7 | 3.7 | II / IV | II | II |
| Ac(A) | 367 | 600 | 433 | 1.19 | 1.24 | 1.20 | 1.20 | 1.20 | 1.21 | 5.7 | 5.2 | 5.4 | IV | II (IV) | II (IV) |
| Cl(A) | 129 | 396 | 332 | 0.310 | 0.399 | 0.444 | 0.318 | 0.309 | 0.389 | 5.1 | 3.4 | 4.0 | II | II | II |
| Acac(A) | 373 | 498 | 431 | 0.979 | 0.972 | 0.946 | 0.987 | 0.995 | 0.963 | 4.3 | 3.9 | 4.0 | IV | IV | IV |
| NO(B) | 51 | 551 | 430 | 0.189 | 0.512 | 0.473 | 0.191 | 0.354 | 0.376 | 6.5 | 3.7 | 3.8 | II | II | II |
| Ac(B) | 490 | 660 | 630 | 0.684 | 0.681 | 0.681 | 0.712 | 0.640 | 0.735 | 2.6 | 2.4 | 2.4 | IV | IV | IV |
| Cl(B) | 67 | 480 | 421 | 0.220 | 0.514 | 0.495 | 0.224 | 0.358 | 0.372 | 6.7 | 5.7 | 5.4 | II | II | II |
| Acac(B) | 451 | 502 | 417 | 0.678 | 0.530 | 0.489 | 0.700 | 0.522 | 0.518 | 2.6 | 2.3 | 2.3 | IV | IV | IV |
| NO(C) | 73 | 422 | 332 | 0.198 | 0.480 | 0.355 | 0.203 | 0.347 | 0.260 | 5.8 | 5.7 | 4.6 | II | II | II |
| Ac(C) | 126 | 376 | 423 | 0.128 | 0.226 | 0.271 | 0.136 | 0.137 | 0.221 | 1.8 | 1.5 | 1.5 | IV | IV (I) | I (IV) |
| Cl(C) | 139 | 416 | 391 | 0.544 | 0.511 | 0.736 | 0.553 | 0.397 | 0.636 | 8.0 | 5.1 | 8.0 | II | II | II |
| Acac(C) | 310 | 410 | 375 | 0.491 | 0.430 | 0.401 | 0.504 | 0.421 | 0.430 | 2.6 | 2.3 | 2.3 | IV | IV | IV |
| NO(D) | 47 | 318 | 148 | 0.179 | 0.310 | 0.287 | 0.182 | 0.205 | 0.254 | 8.2 | 5.0 | 7.3 | II | II | II |
| Ac(D) | 83 | 277 | 116 | 0.318 | 0.358 | 0.331 | 0.322 | 0.291 | 0.325 | 7.8 | 5.0 | 7.2 | II | II | II |
| Cl(D) | 52 | 322 | 292 | 0.208 | 0.280 | 0.344 | 0.211 | 0.170 | 0.248 | 8.2 | 4.4 | 6.6 | II | II | II |
| Acac(D) | 99 | 221 | 75 | 0.363 | 0.289 | 0.129 | 0.368 | 0.240 | 0.117 | 7.0 | 4.5 | 5.3 | II | II | II |
| NO(E) | 81 | 164 | 163 | 0.316 | 0.412 | 0.491 | 0.318 | 0.408 | 0.497 | 6.6 | 5.8 | 5.5 | II | II | II |
| Ac(E) | 419 | 670 | 697 | 0.388 | 0.510 | 0.528 | 0.418 | 0.470 | 0.497 | 1.7 | 1.7 | 1.7 | IV | IV (I) | IV (I) |
| Cl(E) | 48 | 276 | 308 | 0.118 | 0.234 | 0.238 | 0.122 | 0.145 | 0.134 | 5.2 | 3.8 | 3.5 | II | II | II |
| Acac(E) | 333 | 360 | 338 | 1.024 | 0.884 | 0.873 | 1.027 | 0.897 | 0.885 | 5.1 | 4.5 | 4.7 | IV (II) | IV(II) | IV (II) |

a from the adsorption isotherm; for pores with a diameter 1.7 – 300 nm.

Table S2. Thermoanalytic results (the "experimental" values give the weight loss during calcination of the bulk samples) and elemental analyses after calcination (the theoretical values for C, H and N are 0; the residual H is due to Si-OH groups).

| sample | weight loss | | | | elemental analyses | | | |
| --- | --- | --- | --- | --- | --- | --- | --- | --- |
|  | calcd. | TGA | experim. | C | | H | N | Cl |
|  | [%] | [%] | [%] | [%] | | [%] | [%] | [%] |
| NO(A) | 22.3 | 27.5 | 28.5 | 0.16 | | 0.87 | < 0.05 |  |
| Ac(A) | 21.9 | 26.2 | 27.1 | 0.09 | | 0.78 | < 0.05 |  |
| Cl(A) | 17.5 | 28.3 | 28.3 | 0.19 | | 1.12 | < 0.05 | 1.91 |
| Acac(A) | 28.3 | 26.0 | 27.4 | 0.13 | | 0.94 | < 0.02 |  |
| NO(B) | 29.7 | 35.5 | 43.6 | 1.33 | | 1.14 | < 0.05 |  |
| Ac(B) | 29.3 | 29.9 | 29.2 | 0.60 | | 1.21 | < 0.05 |  |
| Cl(B) | 25.8 | 33.1 | 32.7 | 0.86 | | 1.33 | < 0.05 | 0.15 |
| Acac(B) | 34.6 | 33.2 | 34.0 | 0.55 | | 0.79 | < 0.05 |  |
| NO(C) | 35.6 | 35.2 | 45.6 | 0.16 | | 1.23 | < 0.02 |  |
| Ac(C) | 35.3 | 38.9 | 37.7 | 0.07 | | 1.54 | < 0.02 |  |
| Cl(C) | 32.3 | 37.9 | 38.4 | 0.41 | | 1.27 | 0.10 | 1.41 |
| Acac(C) | 39.7 | 38.9 | 38.3 | 0.10 | | 1.27 | < 0.02 |  |
| NO(D) | 23.1 | 32.1 | 32.3 | 0.21 | | 1.28 | < 0.02 |  |
| Ac(D) | 22.7 | 27.5 | 25.5 | 0.28 | | 1.30 | < 0.02 |  |
| Cl(D) | 18.5 | 30.5 | 28.6 | 0.64 | | 1.24 | 0.04 | 1.94 |
| Acac(D) | 28.9 | 29.2 | 29.3 | 0.19 | | 0.93 | < 0.02 |  |
| NO(E) | 26.8 | 38.5 | 33.7 | 0.29 | | 0.99 | < 0.05 |  |
| Ac(E) | 26.4 | 27.5 | 30.5 | 0.82 | | 1.05 | < 0.05 |  |
| Cl(E) | 22.5 | 38.1 | 32.7 | 0.39 | | 0.96 | 0.09 | 0.05 |
| Acac(E) | 32.1 | 31.8 | 34.2 | 0.50 | | 0.71 | < 0.05 |  |

Table S3. Elemental analyses of the series Cl(X)r (all theoretical values are 0)

| Sample | C | N | H | Cl |
| --- | --- | --- | --- | --- |
|  | [%] | [%] | [%] | [%] |
| Cl(**A**)r | 0.11 | 0.84 | < 0.05 | 0.26 |
| Cl(**B**)r | 0.52 | 0.84 | < 0.05 | 0.05 |
| Cl(C)r | 0.20 | 0.97 | < 0.02 | < 0.02 |
| Cl(**D**)r | 0.14 | 0.88 | < 0.02 | < 0.02 |
| Cl(**E**)r | 0.30 | 0.92 | < 0.05 | 0.06 |

Table S4. Employed precursors for the preparation of the composite powders. 1.45 mmol of the metal salts were employed (0.361 g Ni(OAc)24 H2O, 0.345 g NiCl26H2O, 0.421 g Ni(NO3)26 H2O, 0.388 g Ni(acac)2).

| series | silane  [g (mmol)] | TEOS  [g (mmol)] | 0.2 N aqueous ammonia  [ml (mmol)] |
| --- | --- | --- | --- |
| A | 0.384 (1.45) | 2.87 (13.8) | 8.0 (445) |
| B | 0.767 (2.90) | 2.57 (12.4) | 7.84 (436) |
| C | 1.150 (4.35) | 2.27 (10.9) | 7.65 (425) |
| D | 0.642 (2.90) | 2.57 (12.4) | 7.84 (436) |
| E | 0.446 (1.60) | 2.84 (13.6) | 8.0 (445) |

Table S5. Employed precursors for the preparation of the impregnated silica spheres, and weight loss during calcination.

| sample | metal salt  [g] (mmol) | silane  [g] (mmol) | aqu. NH4OH  [g] | pellets  [g] (mmol SiO2) | weight loss during oxidation (TGA) [%] |
| --- | --- | --- | --- | --- | --- |
| NO(A) | 1.259 (4.33) | 1.268 (4.86) | 1.994 | 2.546 (42.4) | 31.0 |
| Ac(A) | 1.069 (4.3) | 1.279 (4.84) | 1.984 | 2.514 (41.8) | 27.0 |
| Cl(A) | 1.044 (4.39) | 1.484 (5.61) | 2.192 | 2.535 (42.2) | 29.9 |
| Acac(A) | 1.135 (4.42) | 1.289 (4.87) | 2.008 | 2.519 (41.9) | 33.9 |
| NO(B) | 1.268 (4.36) | 2.431 (9.19) | 0.565 | 2.422 (40.3) | 45.2 |
| Ac(B) | 1.085 (4.36) | 2.446 (9.25) | 3.764 | 2.371 (39.5) | 35.0 |
| Cl(B) | 1.041 (4.38) | 2.465 (9.32) | 0.556 | 2.448 (40.8) | 37.5 |
| NO(C) | 1.264 (4.35) | 3.289 (12.44) | 5.088 | 2.18 (36.3) | 46.9 |
| Ac(C) | 1.057 (4.25) | 3.258 (12.32) | 5.047 | 2.138 (35.6) | 42.7 |
| Cl(C) | 1.108 (4.28) | 3.300 (12.48) | 5.085 | 2.185 (36.4) |  |
| Acac(C) | 1.110 (4.32) | 3.268 (12.36) | 5.147 | 2.156 (37.2) | 42.5 |
| NO(D) | 1.264 (4.35) | 2.193 (9.91) | 0.556 | 2.212 (36.8) |  |
| Ac(D) | 1.076 (4.32) | 2.193 (9.91) | 3.968 | 2.217 (36.9) | 28.7 |
| Cl(D) | 1.054 (4.43) | 2.253 (10.18) | 0.600 | 2.294 (38.2) | 31.0 |
| Acac(D) | 1.127 (4.53) | 2.23 (10.07) | 4.015 | 2.237 (37.2) | 40.1 |
| NO(E) | 0.643 (2.21) | 0.649 (2.45) | 1.037 | 1.256 (20.9) | 72.0 |
| Ac(E) | 1.101 (4.42) | 1.352 (5.11) | 1.978 | 2.602 (43.3) | 27.0 |
| Cl(E) | 0.527 (2.22) | 0.649 (2.45) | 1.005 | 1.254(20.9) | 25.1 |
| Acac(E) | 0.567 (2.21) | 0.646 (2.43) | 1.006 | 1.251 (20.8) | 30.2 |
